# Supplementary material
Source: MDPI journal article supplement (https://www.mdpi.com/2073-4344/13/1/79)
Supplement: s1 [file s1]

# Plasma jet sputtering as an efficient method for the deposition of nickel and cobalt mixed oxides on stainless-steel meshes: application to VOC oxidation

Květa Jiráťová <sup>1, \*</sup>, Martin Čada <sup>2</sup>, Iryna Naiko <sup>2,3</sup>, Alina Ostapenko <sup>2</sup>, Jana Balabánová <sup>1</sup>, Martin Koštejn <sup>1</sup>, Jaroslav Maixner <sup>4</sup>, Timur Babii <sup>5</sup>, Pavel Topka <sup>1</sup>, Karel Soukup <sup>1</sup>, Zdeněk Hubička <sup>2</sup> and František Kovanda <sup>5</sup>

<sup>1</sup> Institute of Chemical Process Fundamentals of the Czech Academy of Sciences, Rozvojová 135, 165 02 Prague, Czech Republic; jiratova@icpf.cas.cz

<sup>2</sup> Institute of Physics of the Czech Academy of Sciences, Na Slovance 2, 182 21 Prague, Czech Republic

<sup>3</sup> Faculty of Mathematics and Physics, Charles University, V Holešovičkách 2, 180 00 Prague, Czech Republic

<sup>4</sup> Central Laboratories, University of Chemistry and Technology, Prague, Technická 5, 166 28 Prague, Czech Republic

<sup>5</sup> Department of Solid State Chemistry, University of Chemistry and Technology, Prague, Technická 5, 166 28 Prague, Czech Republic

**Table S1.** Average atomic concentrations, determined by EDX, of components deposited on stainless steel meshes by plasma jet sputtering

| Sample                             | C    | O     | Al   | Si   | Cr   | Fe    | Co    | Ni    | Ni correction <sup>a</sup> |
|------------------------------------|------|-------|------|------|------|-------|-------|-------|----------------------------|
| Co <sub>15</sub>                   | 5.66 | 46.23 |      |      | 3.85 | 11.58 | 31.46 | 1.23  | 0                          |
| NiCo <sub>14</sub> <sub>15</sub>   | 5.29 | 47.96 | 0.17 | 0.11 | 2.59 | 7.13  | 28.47 | 8.29  | 0.90                       |
| NiCo <sub>11</sub> <sub>15</sub>   | 5.57 | 44.40 | 0.10 | 0.16 | 5.00 | 16.21 | 12.85 | 15.71 | 0.88                       |
| NiCo <sub>41</sub> <sub>15</sub>   | 5.31 | 46.03 | 0.08 | 0.15 | 4.07 | 12.64 | 14.66 | 17.05 | 0.92                       |
| Ni <sub>15</sub>                   | 5.98 | 43.35 | 0.12 | 0.18 | 3.59 | 11.40 | 6.83  | 28.54 | 0.95                       |
| NiCo <sub>11</sub> <sub>15</sub> * | 9.44 | 41.71 |      |      | 4.10 | 13.11 | 0.25  | 31.39 | 0.95                       |
| Co <sub>80</sub>                   | 5.64 | 49.62 |      |      | 1.28 | 3.30  | 19.55 | 20.61 | 0.98                       |
| NiCo <sub>14</sub> <sub>80</sub>   | 5.76 | 43.74 |      |      | 5.04 | 15.83 | 28.10 | 1.54  | 0                          |
| NiCo <sub>11</sub> <sub>80</sub>   | 4.80 | 43.93 | 0.23 | 0.13 | 4.55 | 14.42 | 24.04 | 7.90  | 0.80                       |
| NiCo <sub>41</sub> <sub>80</sub>   | 5.26 | 48.34 | 0.15 | 0.05 | 2.75 | 7.94  | 16.72 | 18.78 | 0.95                       |
| Ni <sub>80</sub>                   | 5.43 | 48.88 | 0.09 | 0.10 | 2.27 | 6.40  | 17.58 | 19.25 | 0.96                       |
| NiCo <sub>11</sub> <sub>160</sub>  | 6.12 | 46.14 | 0.13 | 0.13 | 2.69 | 8.46  | 7.20  | 29.12 | 0.96                       |
| Co <sub>15</sub>                   | 8.06 | 37.84 |      |      | 5.72 | 18.79 | 0.26  | 29.34 | 0.93                       |
| NiCo <sub>14</sub> <sub>15</sub>   | 5.69 | 48.99 |      |      | 1.82 | 4.75  | 19.16 | 19.59 | 0.97                       |

<sup>a</sup> Ni correction ratio determining portion of Ni originating from the NiCo catalyst

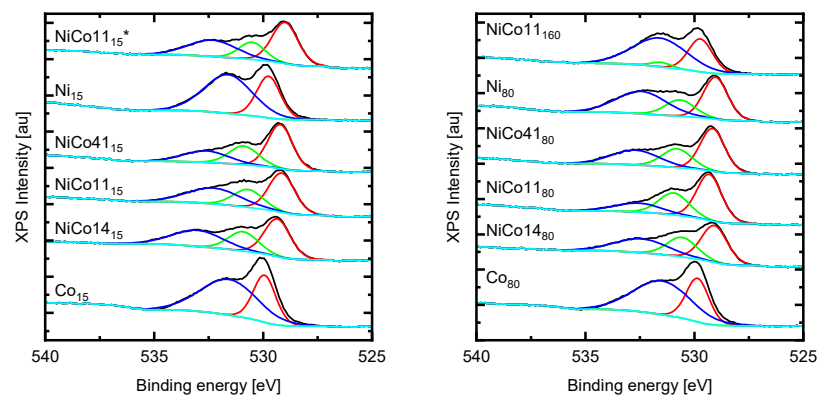

**Figure S1.** Deconvolution of O 1s spectra of the investigated samples.
